# Supplementary material for: Influence of Surface-Modification via PEGylation or Chitosanization of Lipidic Nanocarriers on In Vivo Pharmacokinetic/Pharmacodynamic Profiles of Apixaban
Source: MDPI journal article supplement (doi:10.3390/pharmaceutics15061668), 2023-06-07
Supplement: s1 [file s1]

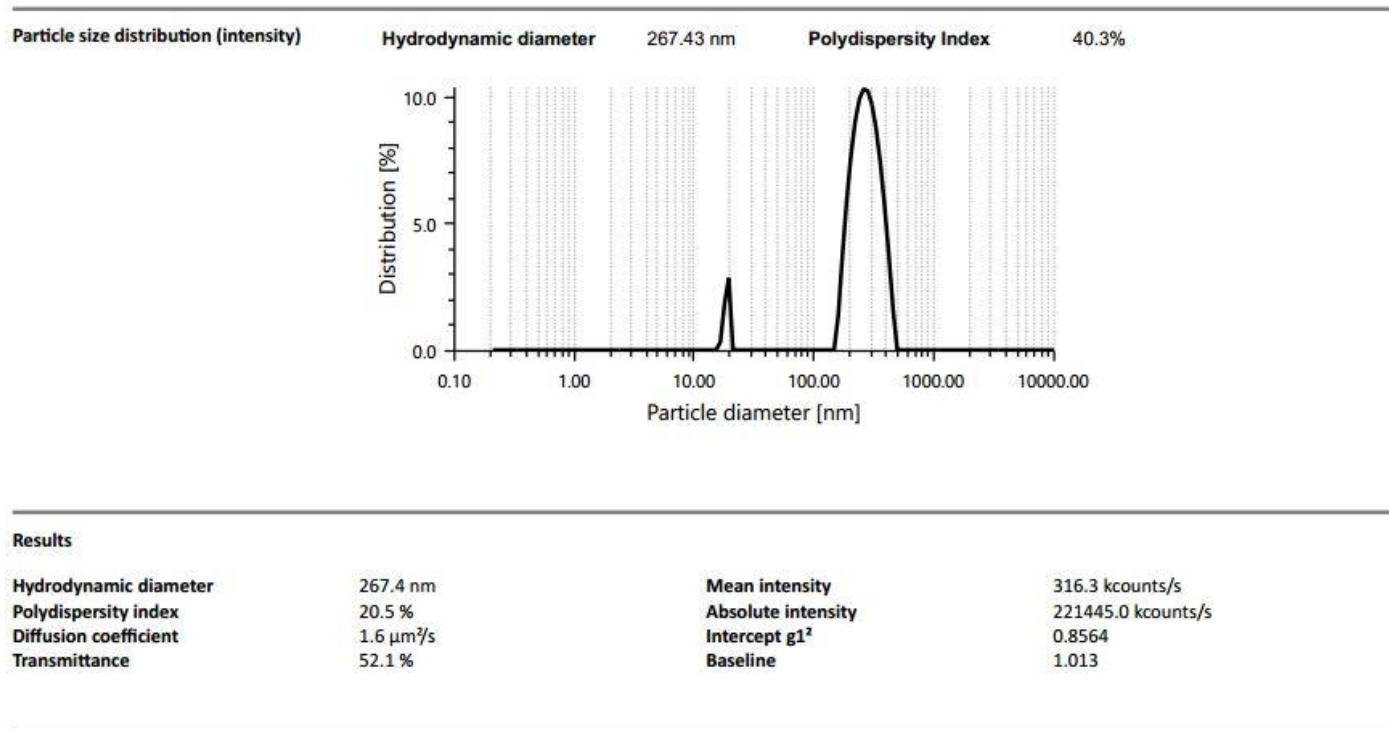

Figure S1. Particle size distribution of APX-NLC.

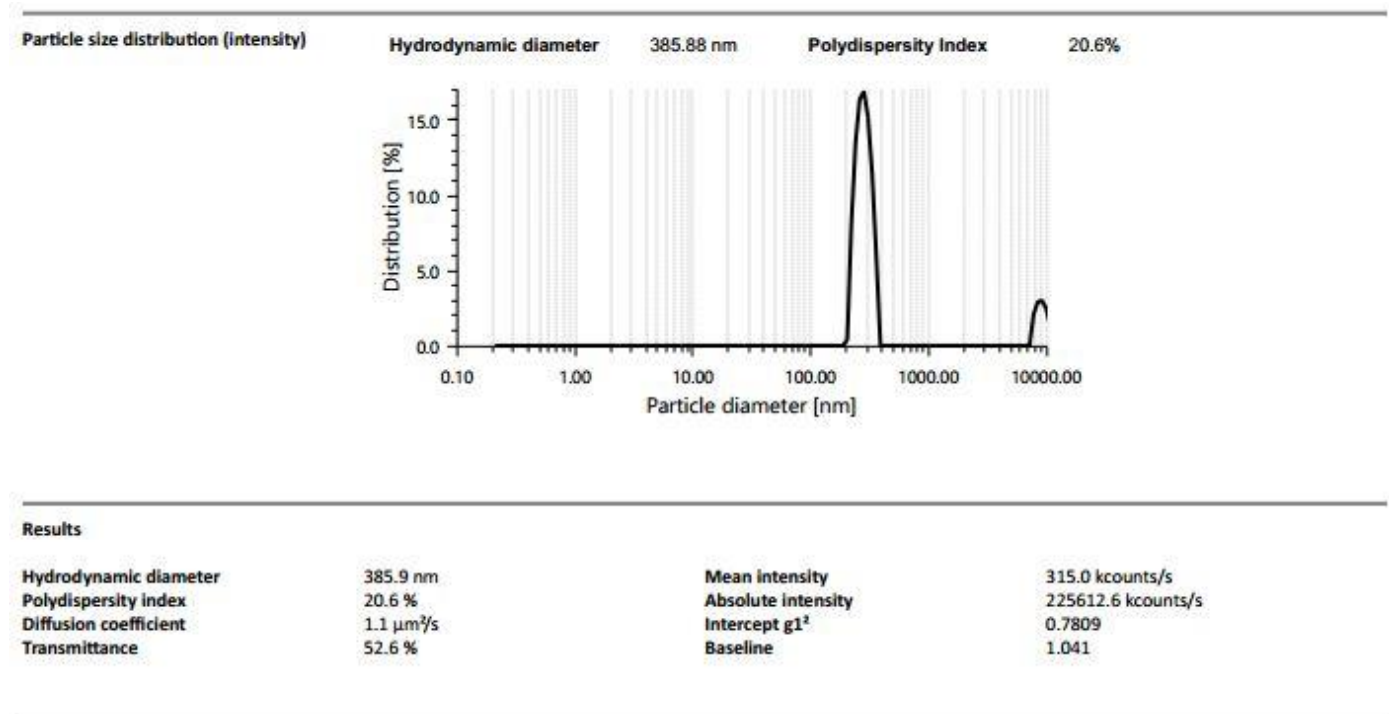

Figure S2. Particle size distribution of APX-PEG-NLC.

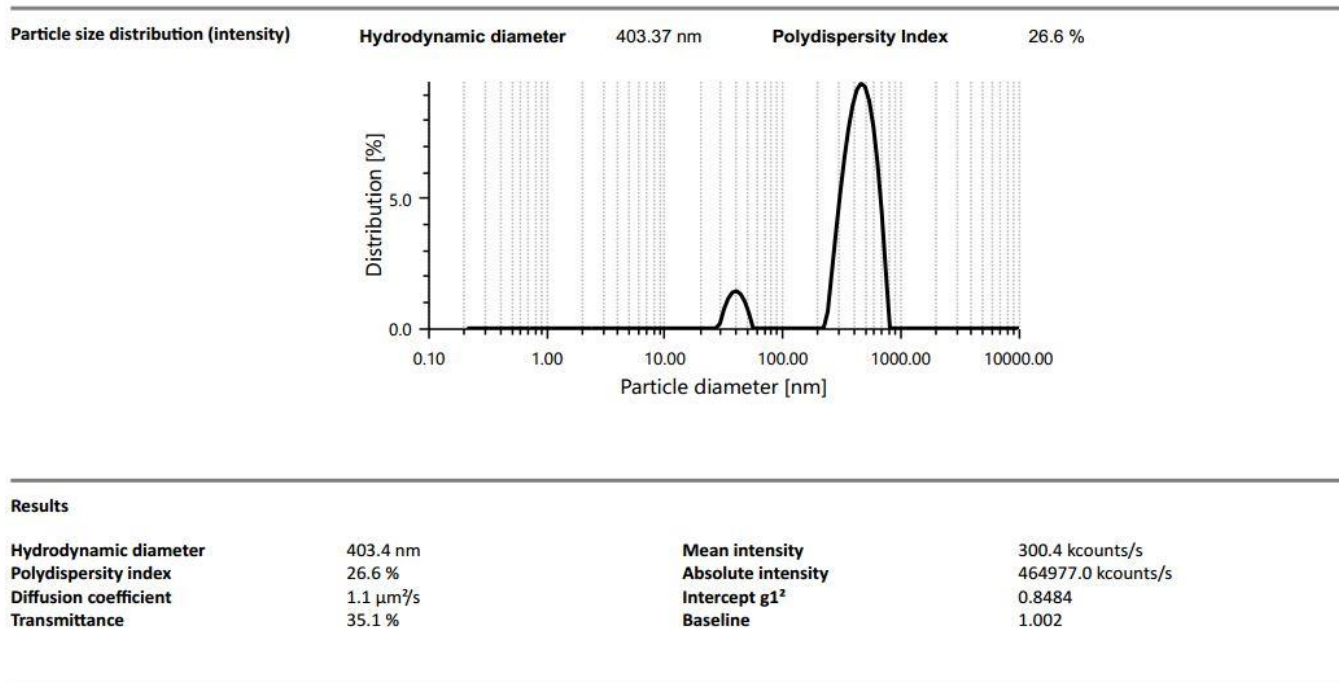

**Figure S3.** Particle size distribution of APX-Ch-NLC.

**Table S1.** Estimated release constants for different kinetic models of APX-loaded nanovesicles

| Formula     |       | Zero order | First order | Second order | Higuchi diffusion model | Hixon   | Baker   |
|-------------|-------|------------|-------------|--------------|-------------------------|---------|---------|
| APX-NLC     | $m_0$ | 1.28 mg    |             |              |                         |         |         |
|             | k     | 2.81976    | -0.0710     | 0.00212      | 18.2022                 | 0.07923 | 0.00944 |
| APX-PEG-NLC | $m_0$ | 1.36 mg    |             |              |                         |         |         |
|             | k     | 2.58081    | -0.0522     | 0.0011       | 16.263                  | 0.0632  | 0.0064  |
| APX-Ch-NLC  | $m_0$ | 1.37 mg    |             |              |                         |         |         |
|             | k     | 2.3612     | -0.0433     | 0.0008       | 14.925                  | 0.0543  | 0.005   |

**Note:**  $m_0$  is the initial amount of drug in 3-ml sample filled in the dialysis bag (calculated according to EE% of each formulation) and k is the release rate constant for each model.

**Table S2.** Korsmeyer-Peppas constants for different APX-loaded nanovesicles

|          | APX-NLC | APX-PEG-NLC | APX-Ch-NLC |
|----------|---------|-------------|------------|
| n        | 0.48955 | 0.51157     | 0.5062     |
| $K_{kp}$ | 0.0312  | 0.0225      | 0.0214     |

**Note:** n is the diffusional exponent ( $n \leq 0.5$ : Fickian diffusion,  $n = 0.5-1$ : Non-fickian release.) and  $K_{kp}$  is the release rate constant for Krosmeier-Peppas model.
